# Supplementary material
Source: PubMed Central journal article supplement (PMC8373708)
Supplement: NIHMS1704540-supplement-tS1-S4.pdf [file NIHMS1704540-supplement-tS1-S4.pdf]

Table S1. Baseline Sample Characteristics for Dementia and MCI Analysis Samples Compared to Excluded Participants

| Incident Dementia Analysis Sample |                   |                     |                      |
|-----------------------------------|-------------------|---------------------|----------------------|
|                                   | Total<br>(n=1959) | Excluded<br>(n=387) | Included<br>(n=1572) |
| Age in years, mean (SD)           | 77.6 (7.40)       | 78.3 (7.67)         | 77.4 (7.32)          |
| Female Sex, n (%)                 | 1201 (61.3%)      | 227 (58.7%)         | 974 (62.0%)          |
| Education, n (%)                  |                   |                     |                      |
| <High School                      | 265 (13.5%)       | 65 (16.8%)          | 200 (12.7%)          |
| High School                       | 884 (45.1%)       | 181 (46.8%)         | 703 (44.7%)          |
| >High School                      | 810 (41.3%)       | 141 (36.4%)         | 669 (42.6%)          |
| Ever Smoker, n (%)                | 1035 (53.0%)      | 210 (55.1%)         | 825 (52.5%)          |
| Incident MCI Analysis Sample      |                   |                     |                      |
|                                   | Total<br>(n=1413) | Excluded<br>(n=250) | Included<br>(n=1163) |
| Age in years, mean (SD)           | 76.8 (7.27)       | 76.8 (7.45)         | 76.7 (7.23)          |
| Female Sex, n (%)                 | 898 (63.6%)       | 155 (62.0%)         | 743 (63.9%)          |
| Education, n (%)                  |                   |                     |                      |
| <High School                      | 162 (11.5%)       | 38 (15.2%)          | 124 (10.7%)          |
| High School                       | 649 (45.9%)       | 119 (47.6%)         | 530 (45.6%)          |
| >High School                      | 602 (42.6%)       | 93 (37.2%)          | 509 (43.8%)          |
| Ever Smoker, n (%)                | 726 (51.5%)       | 137 (55.2%)         | 589 (50.6%)          |

Note: MCI=Mild Cognitive Impairment; SD=standard deviation.

Table S2. Retained Sample at each MYHAT Cycle Visit for Incident Dementia and Incident MCI Analyses

| Incident Dementia Analysis Sample |             |             |             |             |             |             |             |             |             |             |             |
|-----------------------------------|-------------|-------------|-------------|-------------|-------------|-------------|-------------|-------------|-------------|-------------|-------------|
|                                   | Cycle       |             |             |             |             |             |             |             |             |             |             |
|                                   | 1           | 2           | 3           | 4           | 5           | 6           | 7           | 8           | 9           | 10          | 11          |
|                                   | (n=1572)    | (n=1558)    | (n=1374)    | (n=1214)    | (n=1072)    | (n=947)     | (n=847)     | (n=768)     | (n= 688)    | (n=580)     | (n=484)     |
| Age, mean (SD)                    | 77.4(7.3)   | 78.4(7.3)   | 79.1(7.2)   | 79.9(7.1)   | 80.5(7)     | 81.2(6.9)   | 81.8(6.8)   | 82.3(6.6)   | 82.9(6.5)   | 83.2(6.3)   | 83.7(6.1)   |
| Female, n(%)                      | 974 (62%)   | 964 (61.9%) | 863 (62.8%) | 764 (62.9%) | 675 (63%)   | 613 (64.7%) | 556 (65.6%) | 500 (65.1%) | 449 (65.3%) | 378 (65.2%) | 319 (65.9%) |
| Education, n(%)                   |             |             |             |             |             |             |             |             |             |             |             |
| <HS                               | 200 (12.7%) | 197 (12.6%) | 161 (11.7%) | 145 (11.9%) | 126 (11.8%) | 108 (11.4%) | 92 (10.9%)  | 80 (10.4%)  | 63 (9.2%)   | 45 (7.8%)   | 39 (8.1%)   |
| HS                                | 703 (44.7%) | 695 (44.6%) | 611 (44.5%) | 531 (43.7%) | 465 (43.4%) | 416 (43.9%) | 360 (42.5%) | 323 (42.1%) | 282 (41%)   | 234 (40.3%) | 190 (39.3%) |
| >HS                               | 669 (42.6%) | 666 (42.7%) | 602 (43.8%) | 538 (44.3%) | 481 (44.9%) | 423 (44.7%) | 395 (46.6%) | 365 (47.5%) | 343 (49.9%) | 301 (51.9%) | 255 (52.7%) |
| Ever smoker, n(%)                 | 825 (52.5%) | 820 (52.6%) | 709 (51.6%) | 629 (51.8%) | 546 (50.9%) | 481 (50.8%) | 431 (50.9%) | 397 (51.7%) | 356 (51.7%) | 292 (50.3%) | 236 (48.8%) |
| Incident MCI Analysis Sample      |             |             |             |             |             |             |             |             |             |             |             |
|                                   | Cycle       |             |             |             |             |             |             |             |             |             |             |
|                                   | 1           | 2           | 3           | 4           | 5           | 6           | 7           | 8           | 9           | 10          | 11          |
|                                   | (n=1163)    | (n=1151)    | (n=1025)    | (n=920)     | (n=824)     | (n=743)     | (n=666)     | (n=606)     | (n=550)     | (n=468)     | (n=393)     |
| Age, mean (SD)                    | 76.7(7.2)   | 77.8(7.2)   | 78.5(7.1)   | 79.3(7)     | 80(7)       | 80.9(6.9)   | 81.7(6.9)   | 82.2(6.7)   | 82.8(6.7)   | 83.2(6.4)   | 83.6(6.3)   |
| Female, n(%)                      | 743 (63.9%) | 734 (63.8%) | 660 (64.4%) | 589 (64%)   | 532 (64.6%) | 491 (66.1%) | 447 (67.1%) | 401 (66.2%) | 367 (66.7%) | 311 (66.5%) | 263 (66.9%) |
| Education, n(%)                   |             |             |             |             |             |             |             |             |             |             |             |
| <HS                               | 124 (10.7%) | 121 (10.5%) | 102 (10%)   | 94 (10.2%)  | 82 (10%)    | 78 (10.5%)  | 66 (9.9%)   | 58 (9.6%)   | 47 (8.5%)   | 34 (7.3%)   | 30 (7.6%)   |
| HS                                | 530 (45.6%) | 524 (45.5%) | 465 (45.4%) | 412 (44.8%) | 365 (44.3%) | 325 (43.7%) | 281 (42.2%) | 256 (42.2%) | 228 (41.5%) | 188 (40.2%) | 155 (39.4%) |
| >HS                               | 509         | 506         | 458         | 414         | 377         | 340         | 319         | 292         | 275         | 246         | 208         |

|                         |                |                |                |                |                |                |                |                |                |              |                |
|-------------------------|----------------|----------------|----------------|----------------|----------------|----------------|----------------|----------------|----------------|--------------|----------------|
|                         | (43.8%)        | (44%)          | (44.7%)        | (45%)          | (45.8%)        | (45.8%)        | (47.9%)        | (48.2%)        | (50%)          | (52.6%)      | (52.9%)        |
| Ever<br>smoker,<br>n(%) | 589<br>(50.6%) | 585<br>(50.8%) | 517<br>(50.4%) | 465<br>(50.5%) | 409<br>(49.6%) | 368<br>(49.5%) | 331<br>(49.7%) | 310<br>(51.2%) | 281<br>(51.1%) | 234<br>(50%) | 192<br>(48.9%) |

---

Note: MYHAT= Monongahela-Youghiogeny Healthy Aging Team; MCI=Mild Cognitive Impairment; SD=Standard Deviation; HS=High School.

Table S3. Bayesian Spatial Survival Time-Dependent Models Associating PM<sub>2.5</sub> Exposure with Incident Dementia and Incident MCI with or Without Frailty

|                                              | Incident Dementia                                 |                                               | Incident MCI                                        |                                                  |
|----------------------------------------------|---------------------------------------------------|-----------------------------------------------|-----------------------------------------------------|--------------------------------------------------|
| <b>Model 1: Single-Year PM<sub>2.5</sub></b> |                                                   |                                               |                                                     |                                                  |
|                                              | Without frailty<br>DIC: 882.567<br>LPML: -441.481 | With frailty<br>DIC: 882.058<br>LPML: -441.26 | Without frailty<br>DIC: 2247.838<br>LPML: -1124.309 | With frailty<br>DIC: 2226.765<br>LPML: -1116.641 |
|                                              | HR(95% CI)                                        | HR(95% CI)                                    | HR(95% CI)                                          | HR(95% CI)                                       |
| PM <sub>2.5</sub> Single-Year Average        | 1.660(1.331,2.076)                                | 1.669(1.298,2.136)                            | 1.549(1.380,1.737)                                  | 1.746(1.518,2.032)                               |
| Age                                          | 1.130(1.092,1.166)                                | 1.132(1.094,1.170)                            | 1.086(1.070,1.105)                                  | 1.092(1.073,1.111)                               |
| Female Sex                                   | 0.806(0.505,1.251)                                | 0.809(0.507,1.239)                            | 1.133(0.893,1.455)                                  | 1.212(0.942,1.575)                               |
| Ever Smoked                                  | 0.883(0.548,1.425)                                | 0.884(0.567,1.376)                            | 0.876(0.683,1.120)                                  | 0.878(0.699,1.098)                               |
| High School Education                        | 0.612(0.353,1.019)                                | 0.597(0.369,0.974)                            | 0.782(0.562,1.092)                                  | 0.739(0.538,1.009)                               |
| >High School Education                       | 0.602(0.350,1.082)                                | 0.586(0.335,1.003)                            | 0.540(0.377,0.757)                                  | 0.525(0.368,0.751)                               |
| <b>Model 2: Five-Year PM<sub>2.5</sub></b>   |                                                   |                                               |                                                     |                                                  |
|                                              | Without frailty<br>DIC: 872.754<br>LPML:-436.993  | With frailty<br>DIC: 873.146<br>LPML:-437.346 | Without frailty<br>DIC: 2211.644<br>LPML: -1107.149 | With frailty<br>DIC: 2132.22<br>LPML: -1073.092  |
|                                              | HR(95% CI)                                        | HR(95% CI)                                    | HR(95% CI)                                          | HR(95% CI)                                       |
| PM <sub>2.5</sub> Five-Year Average          | 2.162(1.599,3.110)                                | 2.082(1.528,3.015)                            | 2.175(1.848,2.585)                                  | 3.419(2.806,4.164)                               |
| Age                                          | 1.129(1.092,1.168)                                | 1.133(1.095,1.175)                            | 1.088(1.068,1.107)                                  | 1.102(1.079,1.126)                               |
| Female Sex                                   | 0.794(0.506,1.229)                                | 0.805(0.530,1.278)                            | 1.158(0.921,1.461)                                  | 1.228(0.950,1.639)                               |
| Ever Smoked                                  | 0.870(0.553,1.302)                                | 0.885(0.564,1.382)                            | 0.890(0.705,1.109)                                  | 0.888(0.675,1.148)                               |
| High School Education                        | 0.626(0.381,1.043)                                | 0.614(0.341,1.048)                            | 0.790(0.589,1.087)                                  | 0.721(0.502,1.015)                               |
| >High School Education                       | 0.620(0.350,1.082)                                | 0.618(0.344,1.096)                            | 0.558(0.414,0.819)                                  | 0.521(0.348,0.758)                               |

Note: PM<sub>2.5</sub> = Fine Particulate Matter; MCI=Mild Cognitive Impairment; HR=Hazard Ratio; CI=Credible Interval; DIC: deviance information criterion; LPML: log pseudo marginal likelihood.

Incident Dementia and MCI outcomes were modeled separately.

PM<sub>2.5</sub> estimates correspond to a 1 µg/m<sup>3</sup> increase.

See also: Supplemental Methods.

Table S4. Spatial Regression Models Associating PM<sub>2.5</sub> Exposure with Incident Dementia and Incident MCI Additional Adjustment for Household Income

|                                              | Incident Dementia |               | Incident MCI |               |
|----------------------------------------------|-------------------|---------------|--------------|---------------|
|                                              | HR                | 95% CI HR     | HR           | 95% CI HR     |
| <b>Model 1: Single-Year PM<sub>2.5</sub></b> |                   |               |              |               |
| PM <sub>2.5</sub> Single-Year Average        | 1.712             | (1.310,2.279) | 1.745        | (1.492,1.993) |
| Age (in years)                               | 1.133             | (1.086,1.183) | 1.100        | (1.078,1.122) |
| Female Sex                                   | 0.733             | (0.412,1.332) | 1.347        | (0.971,1.890) |
| Ever Smoked                                  | 0.750             | (0.438,1.267) | 0.942        | (0.715,1.234) |
| High School Education                        | 0.574             | (0.319,1.039) | 0.680        | (0.491,0.972) |
| >High School Education                       | 0.501             | (0.250,0.974) | 0.480        | (0.322,0.715) |
| ≥\$40,000 Household Income                   | 0.230             | (0.038,0.753) | 0.815        | (0.530,1.211) |
| <b>Model 2: 5-Year PM<sub>2.5</sub></b>      |                   |               |              |               |
| PM <sub>2.5</sub> Five-Year Average          | 2.123             | (1.519,3.094) | 3.450        | (2.834,4.286) |
| Age (in years)                               | 1.133             | (1.091,1.180) | 1.107        | (1.086,1.133) |
| Female Sex                                   | 0.730             | (0.417,1.238) | 1.420        | (1.072,1.936) |
| Ever Smoked                                  | 0.775             | (0.438,1.358) | 0.984        | (0.771,1.247) |
| High School Education                        | 0.581             | (0.324,1.053) | 0.625        | (0.441,0.862) |
| >High School Education                       | 0.516             | (0.250,1.063) | 0.448        | (0.308,0.644) |
| ≥\$40,000 Household Income                   | 0.246             | (0.068,0.722) | 0.847        | (0.556,1.258) |

Note: PM<sub>2.5</sub> = Fine Particulate Matter; MCI=Mild Cognitive Impairment; HR=Hazard Ratio; CI=Credible Interval. Incident Dementia and MCI outcomes were modeled separately.

PM<sub>2.5</sub> estimates correspond to a 1 µg/m<sup>3</sup> increase.

Incident Dementia analysis sample n=1284; Incident MCI analysis sample n=976.

## Supplemental Methods.

Assumptions of the frailty term in Bayesian spatial survival model:

We define each frailty term  $v_i = v(s_i)$  arises from a Gaussian random field such that  $\mathbf{v} = (v_1, \dots, v_m)$  follows a multivariate Gaussian distribution as  $\mathbf{v} \sim N_m(0, \tau^2 R)$ , where  $s_i$  denotes each distinct spatial location;  $\tau^2$  captures the amount of spatial variation across locations; and  $R$  is the correlation matrix that controlling the spatial dependence of  $v(s)$ . In the survregbayes function in the R package spBayesSurv version 1.1.4, the correlation function for two locations  $s_i$  and  $s_j$  is defined as  $\rho(s_i, s_j) = \rho(s_i, s_j; \phi) = \exp\{-(\phi \|s_i - s_j\|)^v\}$ , where  $\|s_i - s_j\|$  represents the distance between  $s_i$  and  $s_j$ ; parameter  $\phi$  controls the spatial decay over distance; and the shape parameter  $v \in (0, 2]$  is prespecified. Therefore,  $(v_1, \dots, v_m)^T | \tau, \phi \sim GRF(\tau^2, \phi)$  is defined as  $v_i | \{v_j\}_{j \neq i} \sim N\left(-\sum_{\{j: j \neq i\}} \frac{p_{ij} v_j}{p_{ii}}, \frac{\tau^2}{p_{ii}}\right)$ ,  $i = 1, \dots, m$  distinct spatial locations, and  $p_{ij}$  is the  $(i, j)$  element of  $R^{-1}$ . For the priors, the package well-tested default priors are used throughout. More details can be found in Zhou et al (2018, 2020). A burn-in period of 2,000 iterates was considered and the Markov chain was subsampled every 5 iterates to get a final Monte Carlo sample size of 2,000.

Zhou, H., Hanson, T. (2018) A Unified Framework for Fitting Bayesian Semiparametric Models to Arbitrarily Censored Survival Data, Including Spatially Referenced Data. *Journal of the American Statistical Association*, 113:522, 571-581. doi:10.1080/01621459.2017.1356316

Zhou, H., Hanson, T., & Zhang, J. (2020). spBayesSurv: Fitting Bayesian spatial survival models using R. *Journal of Statistical Software*, 92(9):1–33. doi:http://dx.doi.org/10.18637/jss.v092.i09 .
